# Supplementary material for: Accelerated exchange of exon segments in Viperid three-finger toxin genes (Sistrurus catenatus edwardsii; Desert Massasauga)
Source: PubMed Central journal article supplement (PMC2474615; doi:10.1186/1471-2148-8-196), 2008-07-08
Supplement: 1471-2148-8-196-S1.pdf [file 1471-2148-8-196-S1.pdf]

**Additional file 1:** Identity between the amino acid residues in exon segments of the three-finger toxins.  
Numbers in bracket of the segments are as in figure 1.

A

| 3FTxs  | % identity with 3FTx1 |                      |                      |                      |                      |                      |                      |                      |
|--------|-----------------------|----------------------|----------------------|----------------------|----------------------|----------------------|----------------------|----------------------|
|        | Segment 1<br>(1-10)   | Segment 2<br>(11-17) | Segment 3<br>(18-25) | Segment 4<br>(26-39) | Segment 5<br>(40-44) | Segment 6<br>(45-64) | Segment 7<br>(65-67) | Segment 8<br>(68-78) |
| 3FTx 4 | 40.00                 | Nil                  | 16.67                | 78.57                | Nil                  | 95.00                | Nil                  | 90.91                |
| 3FTx 5 | 40.00                 | Nil                  | 16.00                | 78.57                | Nil                  | 95.00                | Nil                  | 81.82                |
| 3FTx 2 | 40.00                 | Nil                  | 12.50                | 50.00                | Nil                  | 45.00                | Nil                  | 63.64                |
| 3FTx 3 | 16.00                 | Nil                  | 33.3                 | 21.43                | Nil                  | 15.00                | Nil                  | 45.45                |

B

| 3FTxs  | % identity with 3FTx4 |                      |                      |                      |                      |                      |                      |                      |
|--------|-----------------------|----------------------|----------------------|----------------------|----------------------|----------------------|----------------------|----------------------|
|        | Segment 1<br>(1-10)   | Segment 2<br>(11-17) | Segment 3<br>(18-25) | Segment 4<br>(26-39) | Segment 5<br>(40-44) | Segment 6<br>(45-64) | Segment 7<br>(65-67) | Segment 8<br>(68-78) |
| 3FTx 1 | 40.00                 | Nil                  | 16.67                | 78.57                | Nil                  | 95.00                | Nil                  | 63.64                |
| 3FTx 5 | 100.00                | Nil                  | 100.00               | 100.00               | 100.00               | 95.00                | Nil                  | 72.73                |
| 3FTx 2 | 30.00                 | Nil                  | 16.00                | 50.00                | 60.00                | 45.00                | Nil                  | 63.64                |
| 3FTx 3 | 25.00                 | Nil                  | 16.67                | 35.71                | 60.00                | 15.00                | Nil                  | 45.45                |

C

| 3FTxs  | % identity with 3FTx2 |                      |                      |                      |                      |                      |                      |                      |
|--------|-----------------------|----------------------|----------------------|----------------------|----------------------|----------------------|----------------------|----------------------|
|        | Segment 1<br>(1-10)   | Segment 2<br>(11-17) | Segment 3<br>(18-25) | Segment 4<br>(26-39) | Segment 5<br>(40-44) | Segment 6<br>(45-64) | Segment 7<br>(65-67) | Segment 8<br>(68-78) |
| 3FTx 1 | 40.00                 | Nil                  | 12.50                | 50.00                | Nil                  | 45.00                | Nil                  | 63.64                |
| 3FTx 4 | 30.00                 | Nil                  | 12.50                | 50.00                | 60.00                | 45.00                | Nil                  | 63.64                |
| 3FTx 5 | 30.00                 | Nil                  | 12.50                | 50.00                | 60.00                | 45.00                | Nil                  | 54.55                |
| 3FTx 3 | 16.67                 | Nil                  | 12.50                | 40.00                | 60.00                | 25.00                | Nil                  | 50.00                |

D

| 3FTxs  | % identity with 3FTx3 |                      |                      |                      |                      |                      |                      |                      |
|--------|-----------------------|----------------------|----------------------|----------------------|----------------------|----------------------|----------------------|----------------------|
|        | Segment 1<br>(1-10)   | Segment 2<br>(11-17) | Segment 3<br>(18-25) | Segment 4<br>(26-39) | Segment 5<br>(40-44) | Segment 6<br>(45-64) | Segment 7<br>(65-67) | Segment 8<br>(68-78) |
| 3FTx 1 | 16.67                 | Nil                  | 33.33                | 21.43                | Nil                  | 15.00                | Nil                  | 45.45                |
| 3FTx4  | 25.00                 | Nil                  | 16.67                | 35.71                | 60.00                | 15.00                | Nil                  | 45.45                |
| 3FTx5  | 25.00                 | Nil                  | 16.67                | 35.71                | 60.00                | 15.00                | Nil                  | 45.45                |
| 3FTx 2 | 16.67                 | Nil                  | 12.50                | 40.00                | 60.00                | 25.00                | Nil                  | 50.00                |

The segments above 60% identity are shown in grey boxes.
